# Supplementary material for: Protection of Poly(Vinyl Chloride) Films against Photodegradation Using Various Valsartan Tin Complexes
Source: PubMed Central journal article supplement (PMC7240378; doi:10.3390/polym12040969), 2020-04-21
Supplement: polymers-12-00969-s001.pdf [file polymers-12-00969-s001.pdf]

# Protection of Poly(vinyl Chloride) Films against Photodegradation using Various Valsartan Tin Complexes

Alaa Mohammed <sup>1</sup>, Gamal A. El-Hiti <sup>2,\*</sup>, Emad Yousif <sup>1,\*</sup>, Ahmed A. Ahmed <sup>3</sup>, Dina S. Ahmed <sup>4</sup> and Mohammad Hayal Alotaibi <sup>5,\*</sup>

<sup>1</sup> Department of Chemistry, College of Science, Al-Nahrain University, Baghdad 64021, Iraq; [alaaalqaycy7@gmail.com](mailto:alaaalqaycy7@gmail.com)

<sup>2</sup> Cornea Research Chair, Department of Optometry, College of Applied Medical Sciences, King Saud University, P.O. Box 10219, Riyadh 11433, Saudi Arabia

<sup>3</sup> Polymer Research Unit, College of Science, Al-Mustansiriyah University, Baghdad 10052, Iraq; [drahmed625@gmail.com](mailto:drahmed625@gmail.com)

<sup>4</sup> Department of Medical Instrumentation Engineering, Al-Mansour University College, Baghdad 64021, Iraq; [dinasaadi86@gmail.com](mailto:dinasaadi86@gmail.com)

<sup>5</sup> National Center for Petrochemicals Technology, King Abdulaziz City for Science and Technology, P.O. Box 6086, Riyadh 11442, Saudi Arabia

\* Correspondence: [gelhiti@ksu.edu.sa](mailto:gelhiti@ksu.edu.sa) (G.A.E.-H.); [emad\\_yousif@hotmail.com](mailto:emad_yousif@hotmail.com) (E.Y.); [mhhalotaibi@kacst.edu.sa](mailto:mhhalotaibi@kacst.edu.sa) (M.H.A.); Tel.: +966-11469-3778 (G.A.E.-H.); Fax: +966-11469-3536 (G.A.E.-H.)

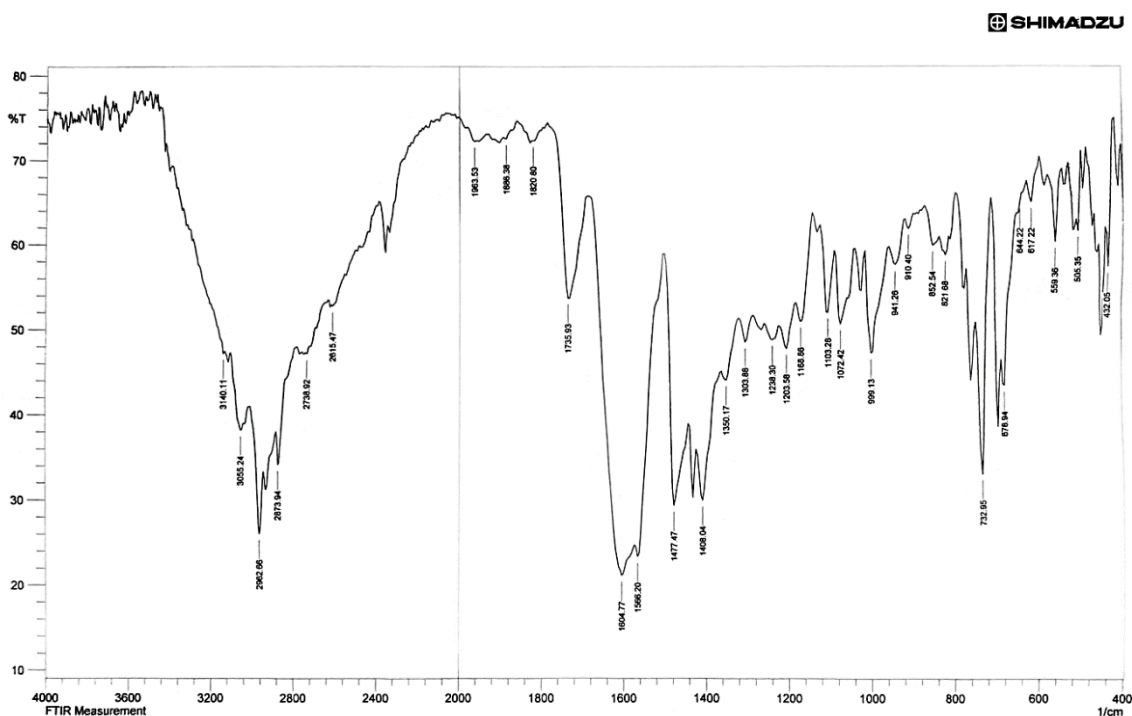

Figure S1. FTIR spectrum of 1.

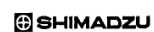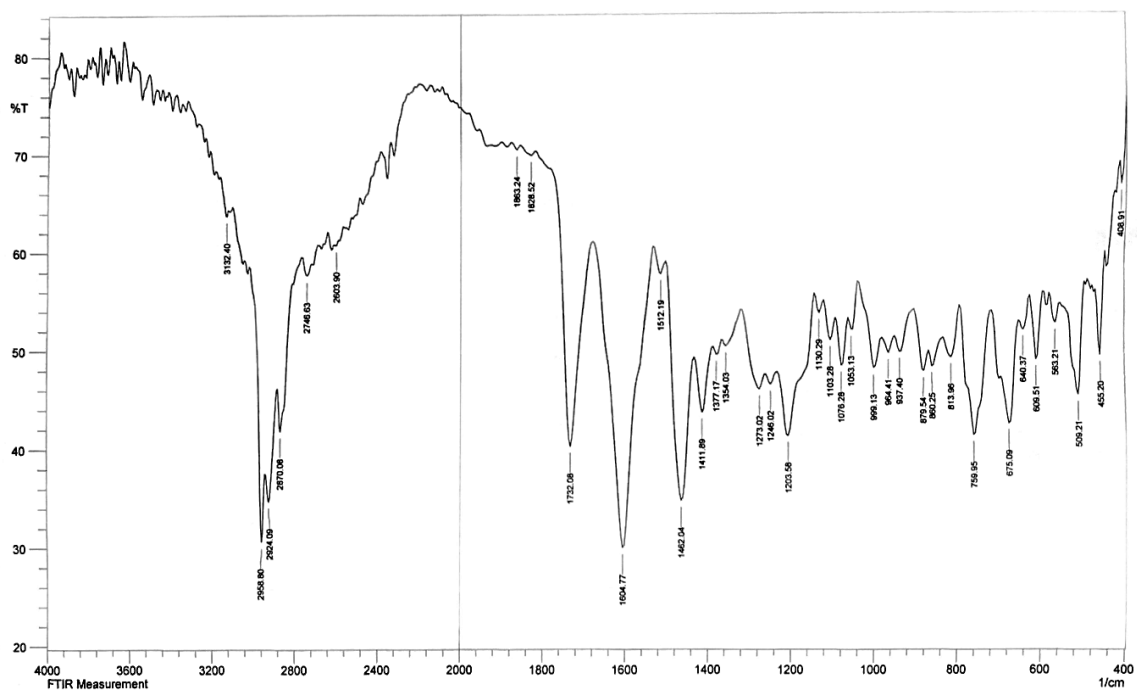

Figure S2. FTIR spectrum of 2.

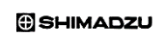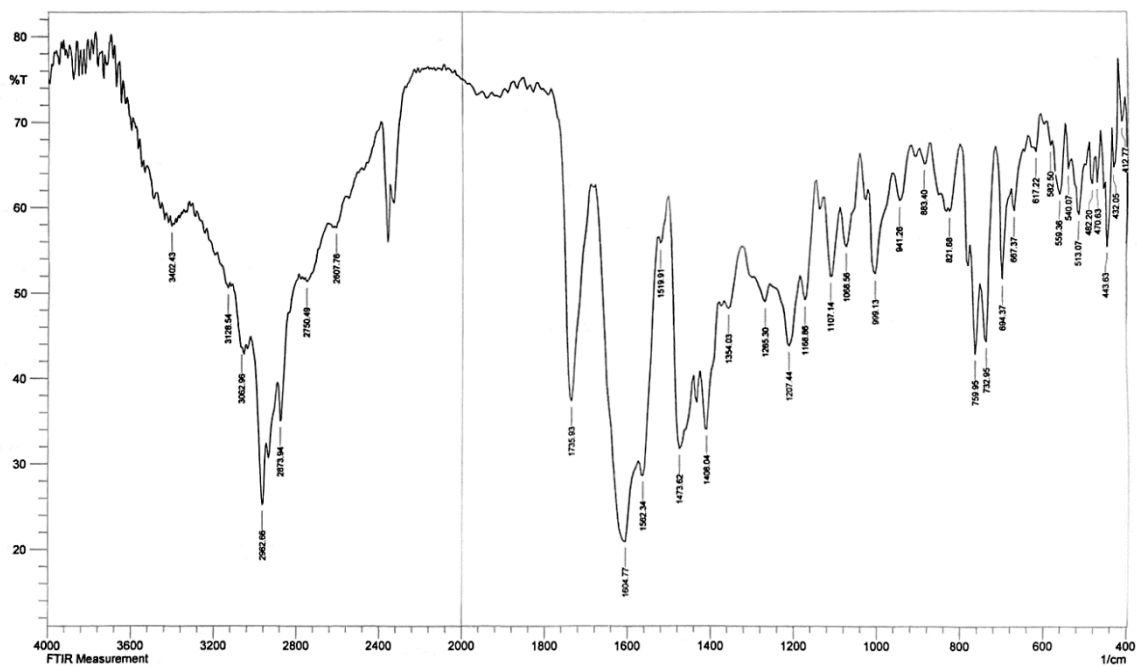

Figure S3. FTIR spectrum of 3.

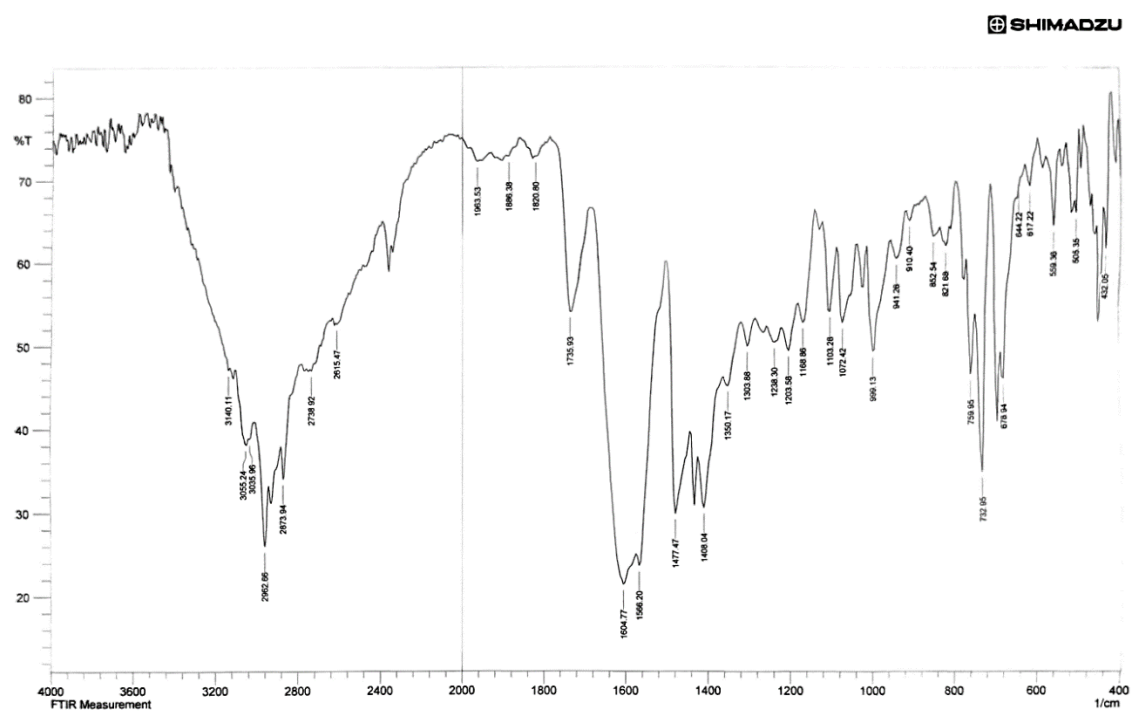

Figure S4. FTIR spectrum of 4.

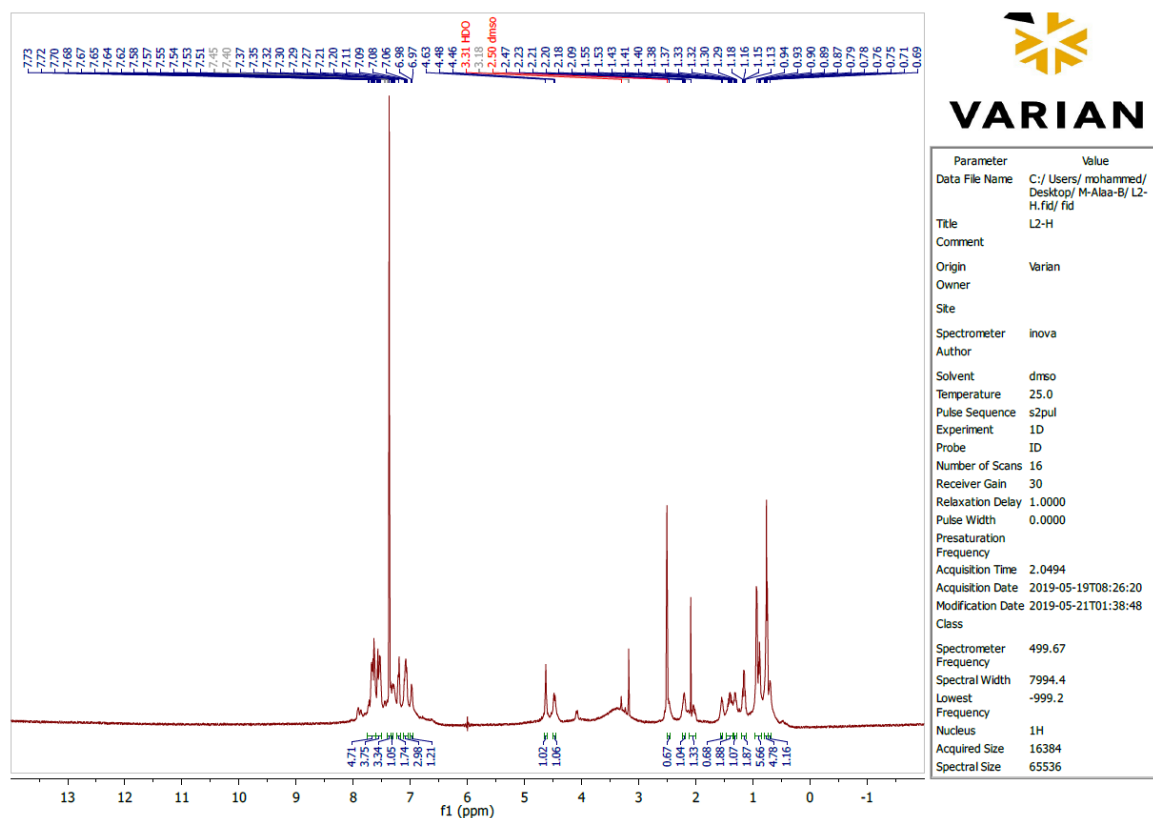Figure S5. <sup>1</sup>H NMR spectrum of 1.

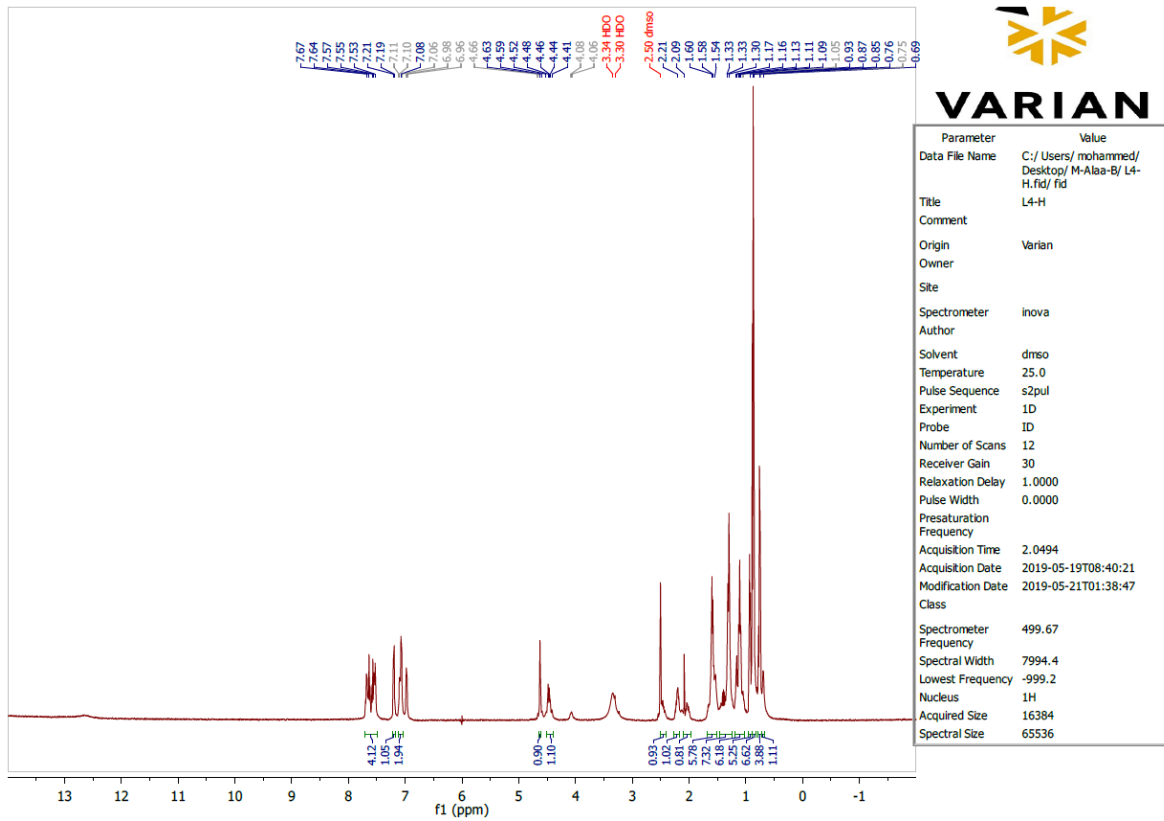

Figure S6. <sup>1</sup>H NMR spectrum of 2.

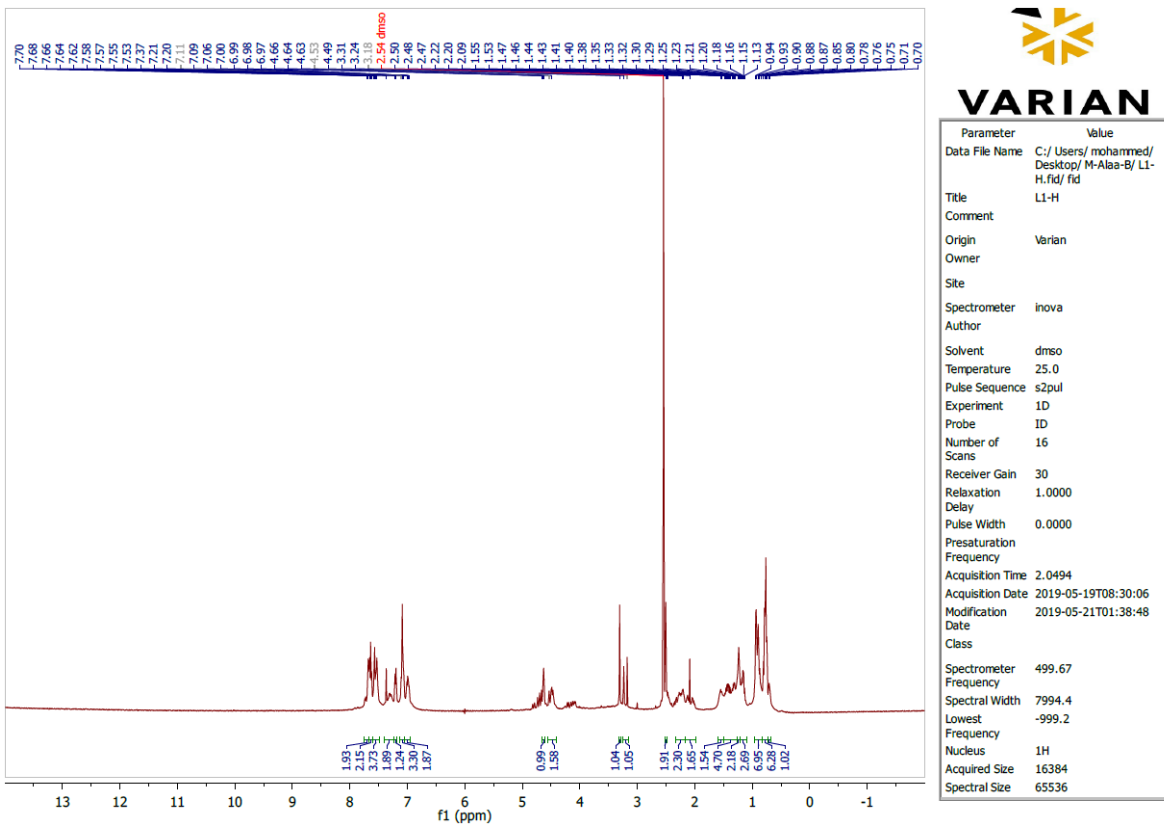

Figure S7. <sup>1</sup>H NMR spectrum of 3.

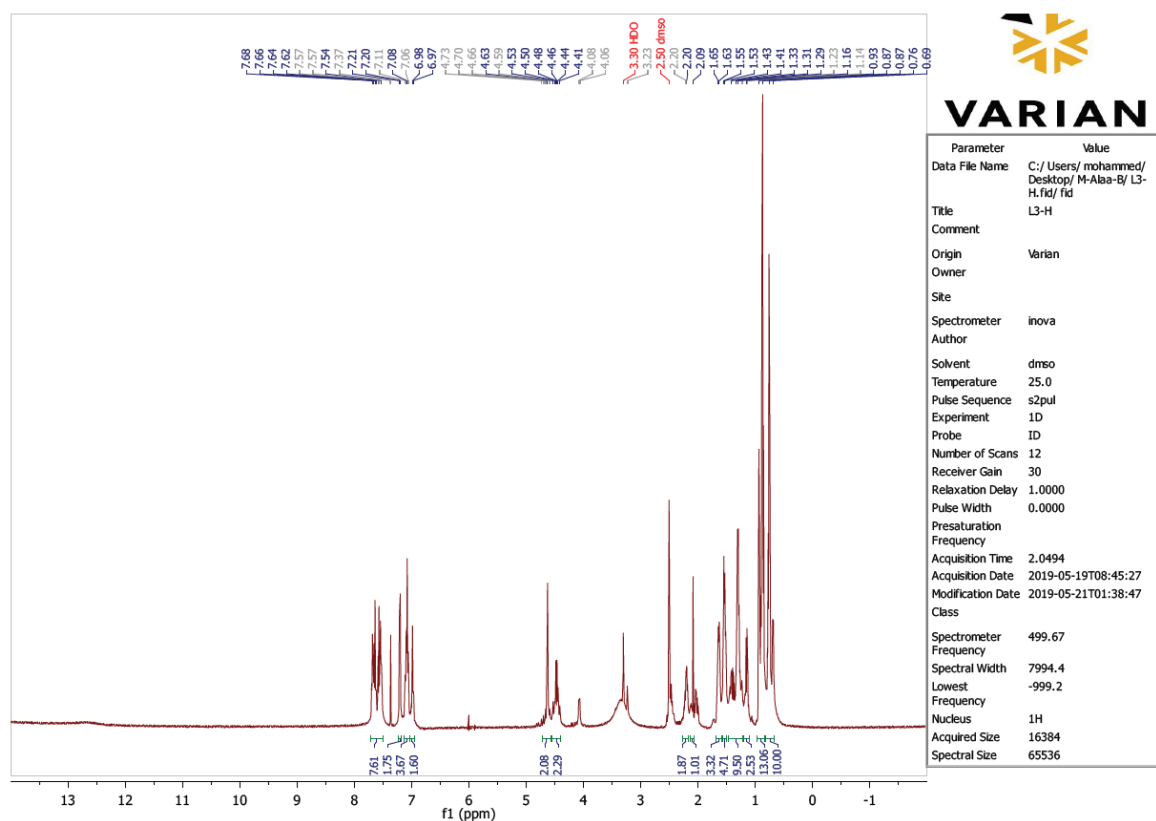Figure S8. <sup>1</sup>H NMR spectrum of 4.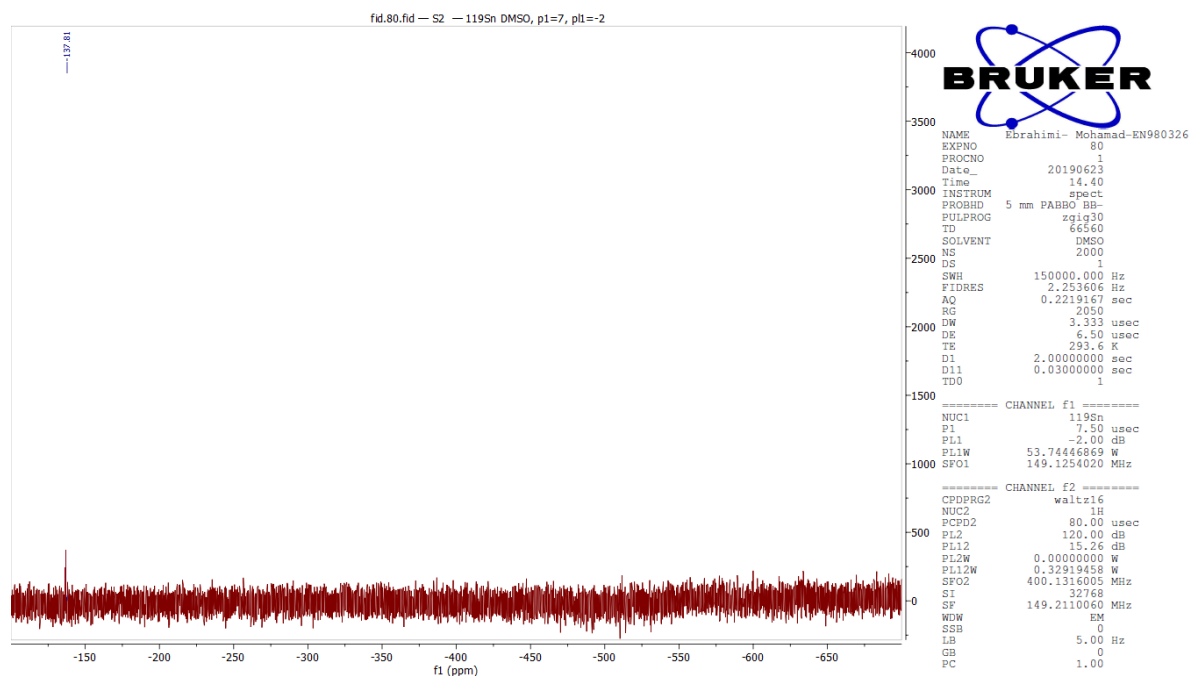Figure S9. <sup>119</sup>Sn NMR spectrum of 1.

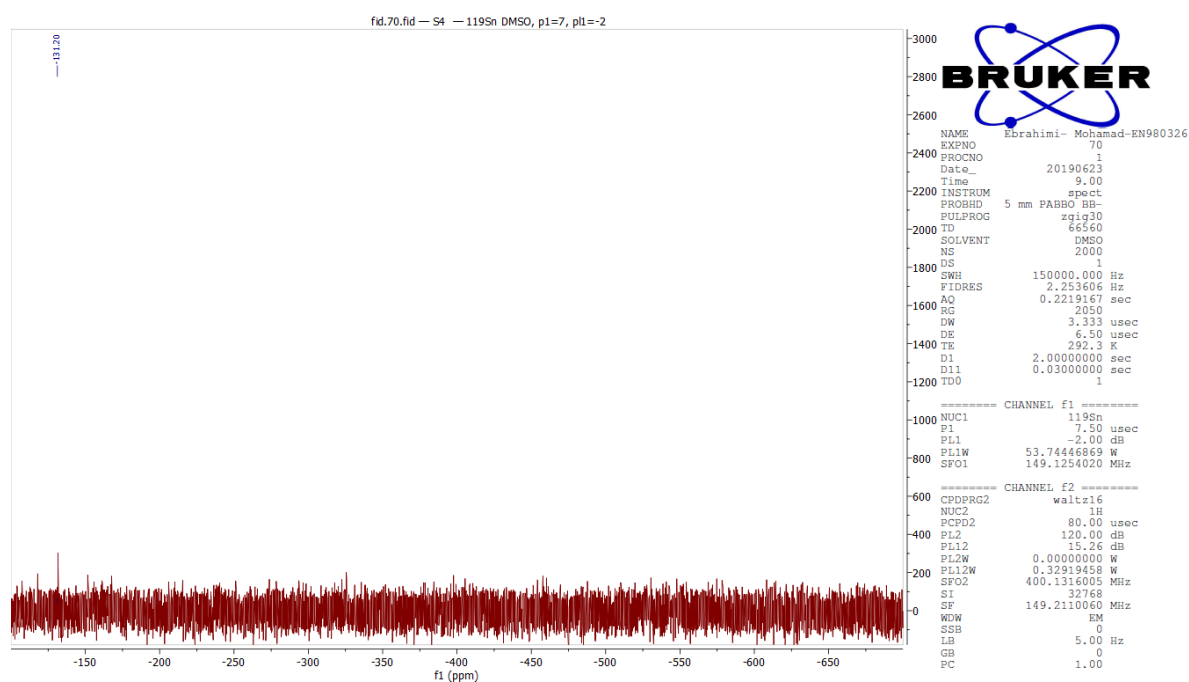Figure S10.  $^{119}\text{Sn}$  NMR spectrum of 2.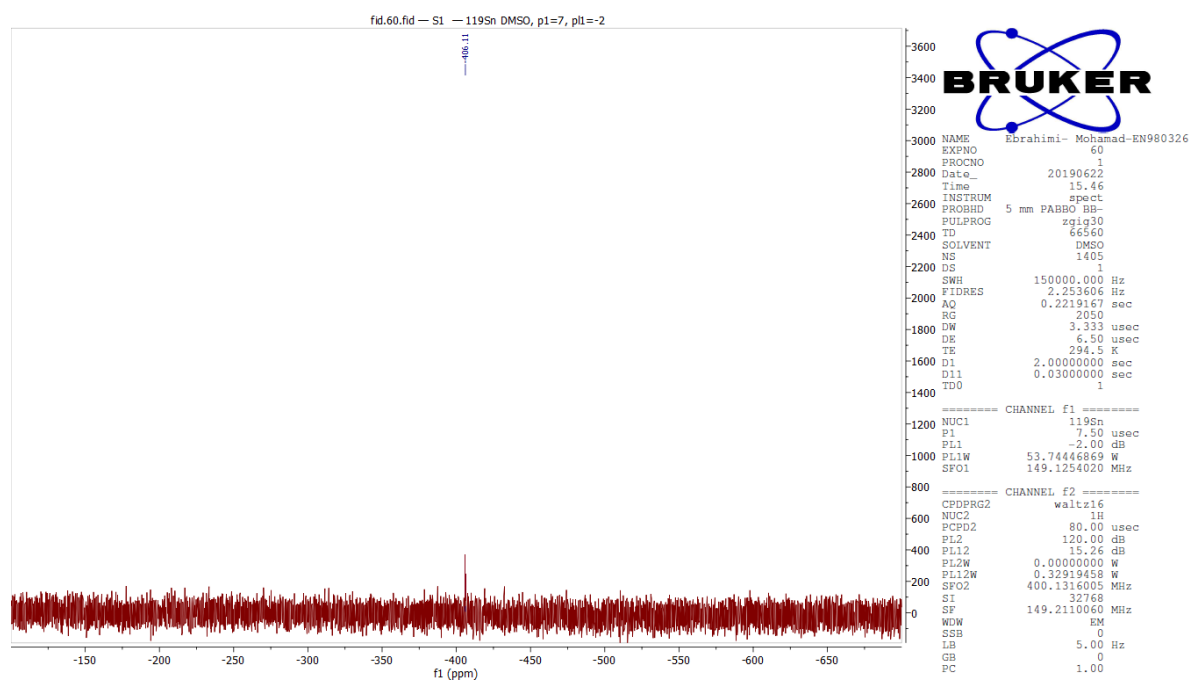Figure S11.  $^{119}\text{Sn}$  NMR spectrum of 3.

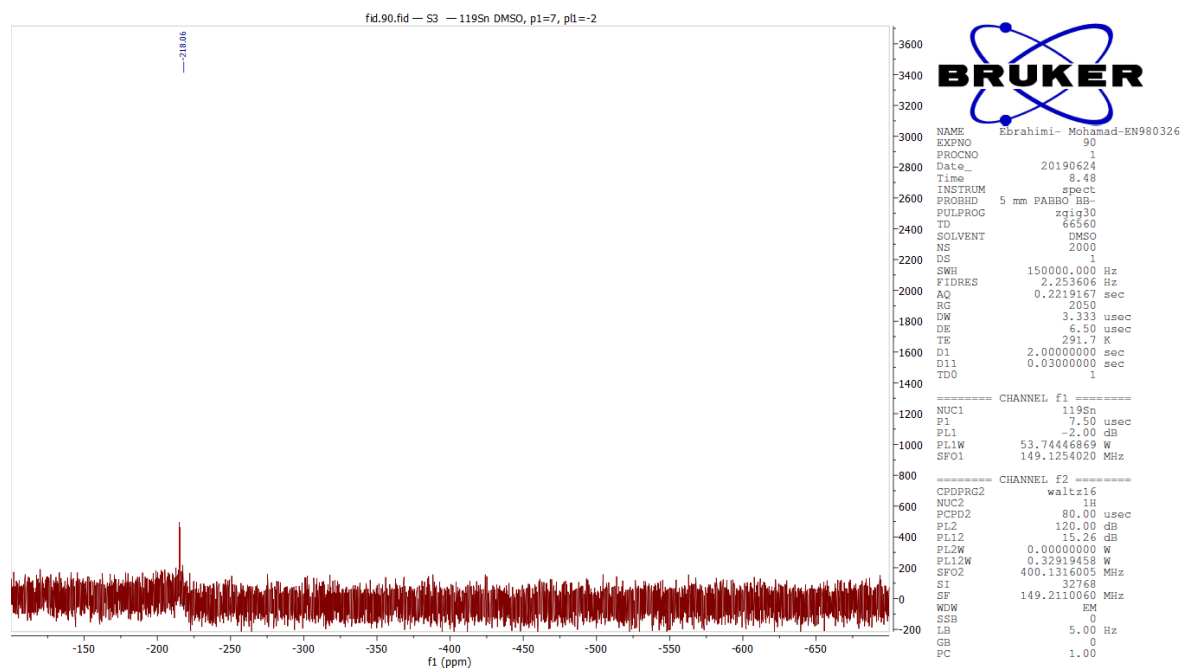

Figure S12. <sup>119</sup>Sn NMR spectrum of 4.

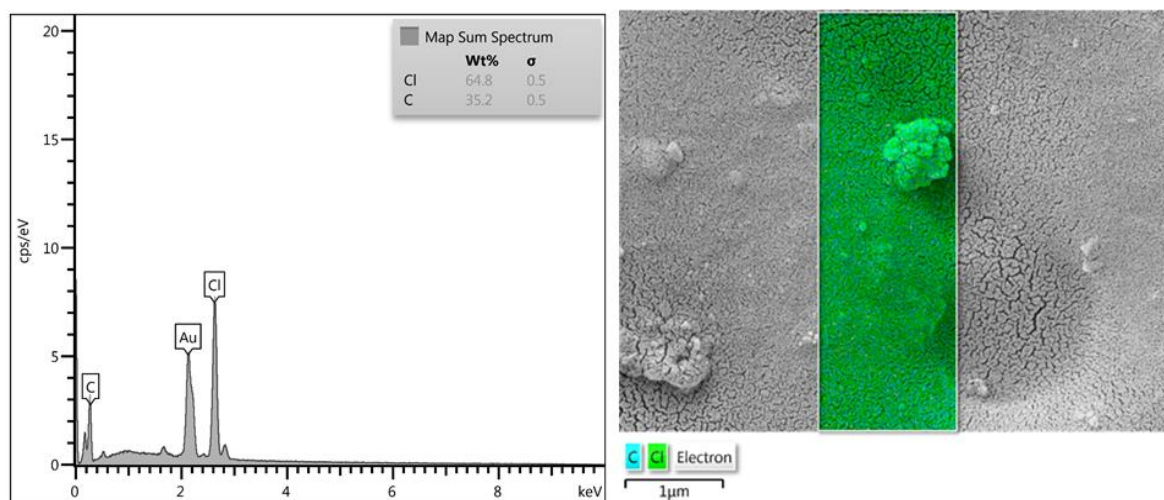

Figure S13. EDX graphs of blank PVC before irradiation

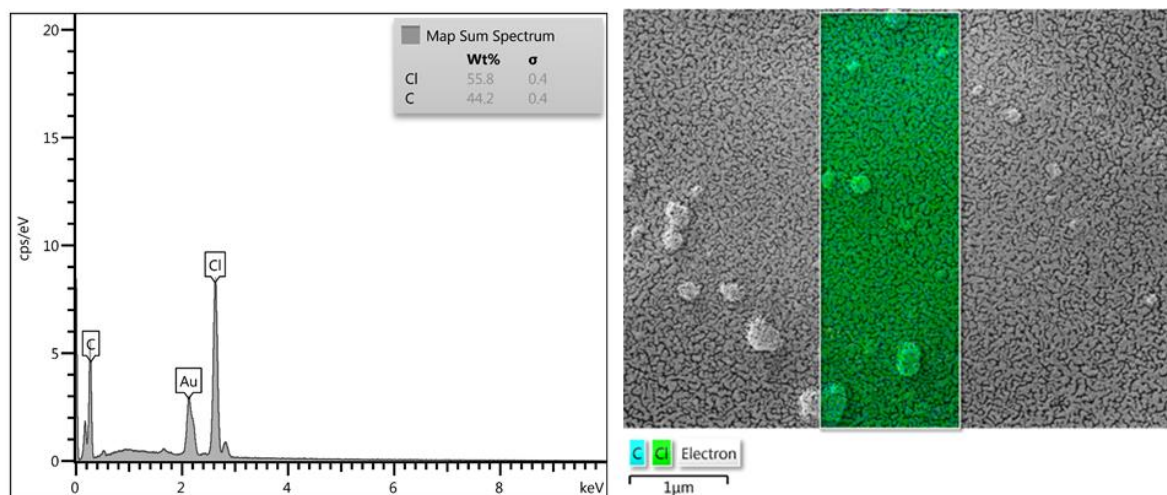

Figure S14. EDX graphs of blank PVC after irradiation.



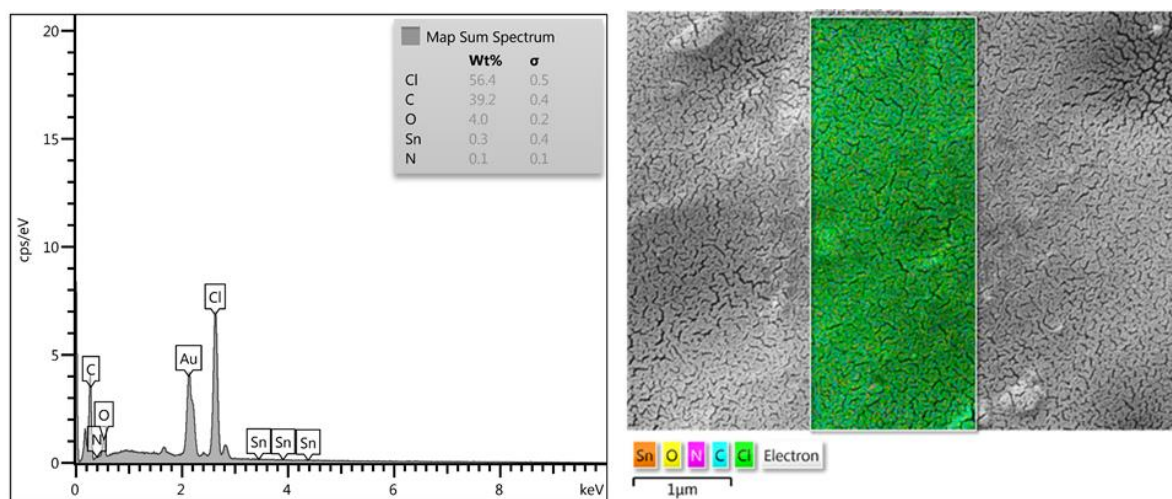

Figure S15. EDX graphs of PVC + complex 1 after irradiation.

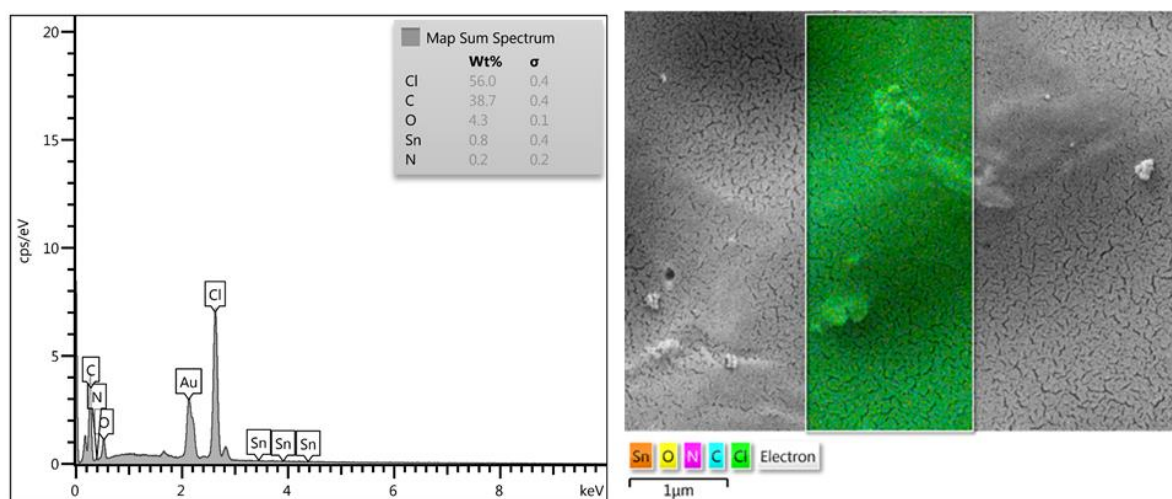

Figure S16. EDX graphs of PVC + complex 2 after irradiation.

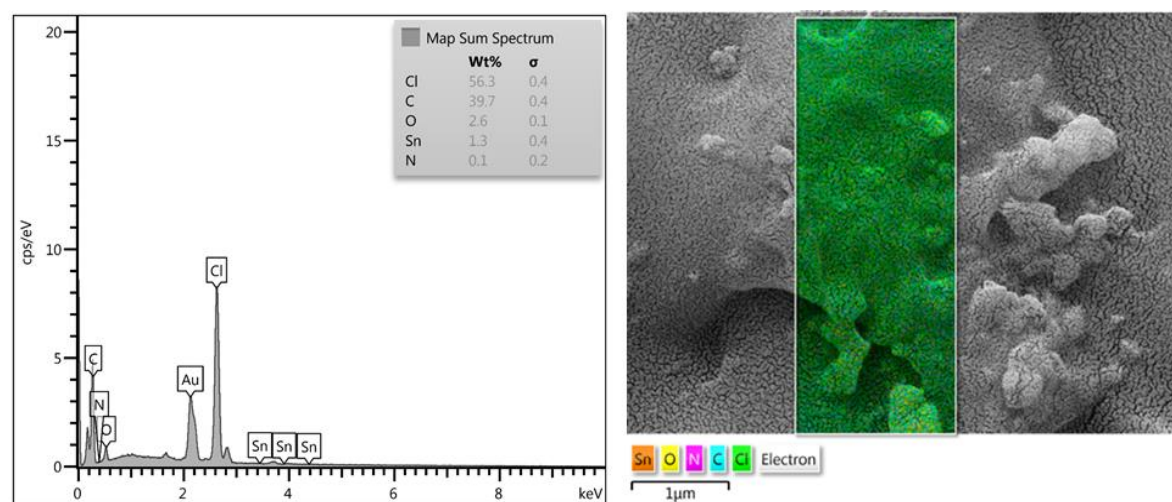

Figure S17. EDX graphs of PVC + complex 3 after irradiation.



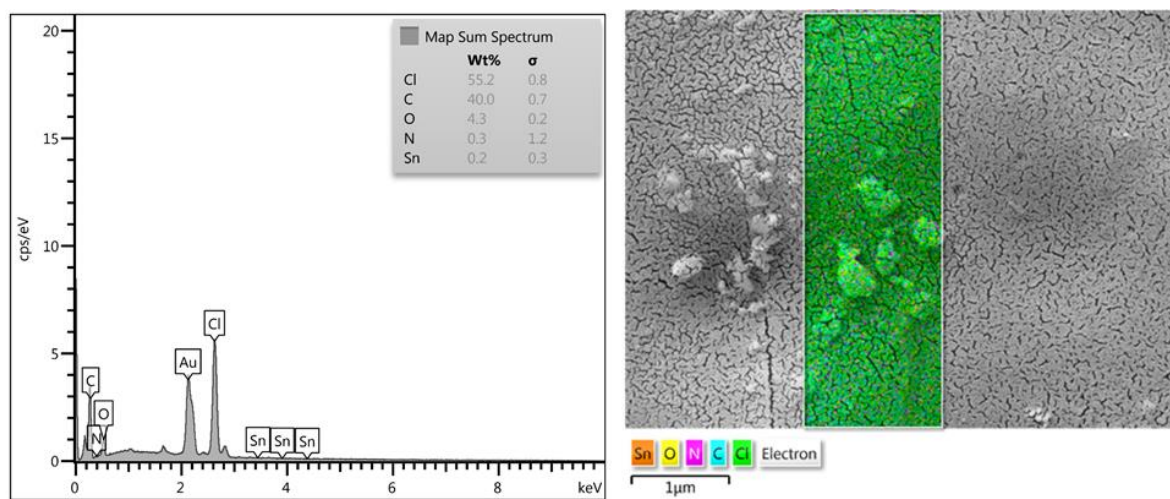

**Figure S18.** EDX graphs of PVC + complex 4 after irradiation.
